# Supplementary material for: Ancient Anorthosites on Mars: Widespread in the Lower Crust
Source: Research Square preprint supplement (doi:10.21203/rs.3.rs-6823461/v1), 2025-06-17
Supplement: Supplementary file 1 [file 61511931d78c30cded4fe7d3.xlsx]

## Sheet: Sheet1
Argyre basin and rim materials'
Argye rim and basin materials'	(sic)
Argyre rim and basin materials'
Argyre rim materials'
Argyre basin member 2'
Argyre basin member 3'
Old crater materials'
Young crater materials'
